# Supplementary material for: Computerized Clinical Decision Support Systems for the Early Detection of Sepsis Among Adult Inpatients: Scoping Review
Source: PubMed Central journal article supplement (PMC8908200; doi:10.2196/31083), 2022-02-23
Supplement: jmir_v24i2e31083_app5.pdf [file jmir_v24i2e31083_app5.pdf]

## Multimedia Appendix 5: Main study characteristics

| Author (Year)       | Type of publication | Country       | Principal study type                     | Setting                 | Number of sites | Number of participants | Population        | CCDS type   | CCDS sepsis criteria                                         | Outcome category                                    |
|---------------------|---------------------|---------------|------------------------------------------|-------------------------|-----------------|------------------------|-------------------|-------------|--------------------------------------------------------------|-----------------------------------------------------|
| Aakre (2016)[40]    | Clinical Trial      | Unspecified   | single cohort                            | ICU                     | NR              | 215                    | Adult             | Unspecified | SOFA                                                         | Sepsis Treatment/Management, Usability              |
| Aakre (2017)_1[41]  | Journal Article     | United States | single cohort                            | ICU                     | 2               | 215                    | Age not specified | Homegrown   | SOFA                                                         | Patient Outcomes                                    |
| Aakre (2017)_2[42]  | Journal Article     | United States | Interview                                | ICU                     | NR              | 12                     | Adult             | Homegrown   | SOFA                                                         | Usability                                           |
| Acquah (2014)[43]   | Conference Abstract | United States | Not enough information to determine      | ED                      | 1               | NR                     | Age not specified | Homegrown   | Unspecified                                                  | Sepsis Treatment/Management                         |
| Afshar (2019)[44]   | Journal Article     | United States | before/after (not controlled)            | Hospital-wide           | 1               | 13877                  | Adult             | Homegrown   | MEWS                                                         | Patient Outcomes, Sepsis Treatment/Management, Cost |
| Alsolamy (2014)[45] | Journal Article     | Saudi Arabia  | single cohort                            | ED                      | 1               | 49838                  | Adult             | Homegrown   | Organ dysfunction, SIRS + Organ dysfunction                  | Patient Outcomes, Sepsis Treatment/Management       |
| Amland (2016)_1[46] | Journal article     | United States | single cohort                            | Hospital-wide           | 5               | 6200                   | Adult             | Commercial  | SIRS, SIRS + Organ dysfunction                               | Patient Outcomes, Sepsis Treatment/Management       |
| Amland (2016)_2[47] | Journal Article     | United States | single cohort                            | Hospital-wide (not-ICU) | 1               | 16527                  | Adult             | Commercial  | SIRS, SIRS + Organ dysfunction                               | Patient Outcomes                                    |
| Amland (2018)_1[48] | Journal Article     | United States | single cohort                            | Hospital-wide           | 8               | 17044                  | Adult             | Commercial  | SIRS, SIRS + Organ dysfunction                               | Patient Outcomes, Sepsis Treatment/Management       |
| Amland (2018)_2[49] | Journal Article     | United States | single cohort                            | Hospital-wide           | 8               | 75958                  | Adult             | Commercial  | SIRS, SIRS + Organ dysfunction                               | Patient Outcomes, Sepsis Treatment/Management       |
| Arabi (2017)[50]    | Journal Article     | Saudi Arabia  | before/after (not controlled)            | ED                      | 1               | 1330                   | Adult             | Homegrown   | Organ dysfunction, SIRS + Organ dysfunction                  | Patient Outcomes, Sepsis Treatment/Management       |
| Austrian (2018)[51] | Journal article     | United States | interrupted time series (not controlled) | ED                      | 1               | 2144                   | Adult             | Homegrown   | Other, SIRS                                                  | Patient Outcomes, Sepsis Treatment/Management       |
| Bansal (2018)[52]   | Journal Article     | United States | single cohort                            | ED                      | 1               | 27106                  | Age not specified | Unspecified | SIRS, Unspecified                                            | Patient Outcomes, Sepsis Treatment/Management       |
| Becker (2018)[53]   | Conference Abstract | United States | before/after (not controlled)            | ED                      | 1               | 903                    | Age not specified | Unspecified | Other                                                        | Patient Outcomes, Sepsis Treatment/Management       |
| Benson (2014)[54]   | Journal Article     | United States | before/after (not controlled)            | medical-surgical units  | 1               | 239                    | Age not specified | Homegrown   | Other + SIRS                                                 | Patient Outcomes, Sepsis Treatment/Management, Cost |
| Berger (2010)[55]   | Journal Article     | United States | before/after (not controlled)            | ED                      | 1               | 5796                   | Adult             | Homegrown   | SIRS                                                         | Patient Outcomes, Sepsis Treatment/Management       |
| Biltoft (2012)[56]  | Conference Abstract | United States | before/after (not controlled)            | Hospital-wide (not-ICU) | 1               | NR                     | Age not specified | Unspecified | SIRS                                                         | Patient Outcomes, Sepsis Treatment/Management, Cost |
| Bradley (2019)[57]  | Conference Abstract | United States | before/after (not controlled)            | Specific ward           | 3               | NR                     | Age not specified | Homegrown   | MEWS                                                         | Patient Outcomes                                    |
| Brandt (2015)[58]   | Journal Article     | United States | single cohort                            | Hospital-wide           | 1               | NR                     | Adult             | Homegrown   | SIRS + Organ dysfunction, SIRS + sign of suspected infection | Patient Outcomes, Sepsis Treatment/Management       |

| Author (Year)         | Type of publication          | Country        | Principal study type          | Setting                          | Number of sites | Number of participants | Population        | CCDS type   | CCDS sepsis criteria                                                           | Outcome category                                         |
|-----------------------|------------------------------|----------------|-------------------------------|----------------------------------|-----------------|------------------------|-------------------|-------------|--------------------------------------------------------------------------------|----------------------------------------------------------|
| Brown (2016)[59]      | Journal Article              | United States  | single cohort                 | ED                               | 1               | 58603                  | Adult             | Homegrown   | SIRS + MAP                                                                     | Patient Outcomes                                         |
| Buck (2014)[60]       | Journal Article              | United States  | single cohort                 | Specific ward                    | 3               | 617                    | Age not specified | Homegrown   | SIRS + Organ dysfunction                                                       | Patient Outcomes                                         |
| Carlbom (2014)[61]    | Conference Abstract          | Unspecified    | single cohort                 | Acute care wards (not ICU or ED) | NR              | NR                     | Age not specified | Homegrown   | Other, SIRS                                                                    | Patient Outcomes                                         |
| Chanas (2019)[62]     | Journal Article              | United States  | single cohort                 | Surgical, trauma, and burn ICU   | 1               | 97                     | Age not specified | Unspecified | Blood cultures & vasopressor ordered/administrated within 24 hrs of each other | Patient Outcomes, Sepsis Treatment/Management            |
| Chang (2015)[63]      | Conference Abstract          | United States  | single cohort                 | ICU                              | 1               | 91                     | Adult             | Homegrown   | SIRS + Organ dysfunction                                                       | Patient Outcomes                                         |
| Colorafi (2019)[64]   | Journal Article              | United States  | single cohort                 | Hospital-wide                    | 26              |                        | Adult             | Commercial  | SIRS, SIRS + Organ dysfunction                                                 | Patient Outcomes, Sepsis Treatment/Management            |
| Comlekoglu (2020)[65] | Conference Abstract          | Unspecified    | controlled study              | ED                               | 1               | 16234                  | Age not specified | Unspecified | SIRS                                                                           | Patient Outcomes, Sepsis Treatment/Management            |
| Croft (2014)[66]      | Plenary paper                | United States  | before/after (not controlled) | Surgical ICU                     | NR              | 184                    | Age not specified | Homegrown   | MEWS-SRS                                                                       | Patient Outcomes, Sepsis Treatment/Management            |
| Danak (2014)[67]      | Thesis                       | United States  | single cohort                 | ED                               | 1               | 20789                  | Adult             | Unspecified | SIRS                                                                           | Patient Outcomes, Sepsis Treatment/Management            |
| Downing (2019)[68]    | Journal article              | Unspecified    | RCT                           | Inpatient wards (not ICU)        | 1               | 1123                   | Adult             | Homegrown   | SIRS + Organ dysfunction + sign of suspected infection                         | Patient Outcomes, Sepsis Treatment/Management, Usability |
| Dumont (2013)[69]     | Journal Article              | United States  | before/after (not controlled) | Hospital-wide                    | NR              | NR                     | Age not specified | Homegrown   | SIRS                                                                           | Patient Outcomes, Sepsis Treatment/Management            |
| Dziadzko (2016)[70]   | Journal Article              | United States  | RCT                           | ICU                              | 1               | 23                     | Adult             | Unspecified | Unspecified                                                                    | Sepsis Treatment/Management, Usability                   |
| Eck (2009)[71]        | Conference Abstract          | Unspecified    | single cohort                 | ICU                              | 1               | 176                    | Age not specified | Homegrown   | SIRS + Organ dysfunction + shock                                               | Patient Outcomes, Sepsis Treatment/Management            |
| Ehrlichman (2014)[72] | Conference Abstract          | Unspecified    | single cohort                 | Specific ward                    | 1               | 301                    | Age not specified | Commercial  | SIRS, SIRS + Organ dysfunction                                                 | Patient Outcomes                                         |
| Engineer (2016)[73]   | Conference abstract protocol | United States  | single cohort                 | ED                               | 1               | NR                     | Age not specified | Homegrown   | Abnormal vital signs & laboratory results, SIRS                                | Sepsis Treatment/Management                              |
| Eren (2016)[74]       | Conference Abstract          | Turkey         | single cohort                 | ICU                              | 1               | 1384                   | Age not specified | Homegrown   | SIRS + SBP                                                                     | Patient Outcomes                                         |
| Faisal (2019)[75]     | Journal Article              | United Kingdom | single cohort                 | ED                               | 3               | 73851                  | Adult             | Unspecified | NEWS                                                                           | Patient Outcomes                                         |
| Falimirski (2016)[76] | Conference Abstract          | United States  | single cohort                 | Non-critical care wards          | 2               | 313                    | Age not specified | Homegrown   | modified SIRS                                                                  | Patient Outcomes                                         |

| Author (Year)           | Type of publication | Country       | Principal study type          | Setting                             | Number of sites | Number of participants | Population        | CCDS type   | CCDS sepsis criteria                                   | Outcome category                                    |
|-------------------------|---------------------|---------------|-------------------------------|-------------------------------------|-----------------|------------------------|-------------------|-------------|--------------------------------------------------------|-----------------------------------------------------|
| Fee (2014)[77]          | Conference Abstract | United States | before/after (not controlled) | ED                                  | 1               | NR                     | Adult             | Unspecified | SIRS, SIRS + Organ dysfunction                         | Patient Outcomes, Sepsis Treatment/Management       |
| Fogerty (2016)[78]      | Conference Abstract | Unspecified   | single cohort                 | Inpatient wards                     | NR              | 11894                  | Adult             | Unspecified | modified SIRS                                          | Patient Outcomes, Sepsis Treatment/Management       |
| Fogerty (2019)[79]      | Journal Article     | United States | before/after (not controlled) | Internal Medicine Department        | 1               | 15739                  | Age not specified | Homegrown   | SIRS + SBP + serum creatinine                          | Patient Outcomes                                    |
| Gatewood (2015)[80]     | Journal Article     | United States | before/after (not controlled) | ED                                  | 1               | NR                     | Age not specified | Homegrown   | SIRS                                                   | Patient Outcomes, Sepsis Treatment/Management       |
| Gerald (2011)_1[81]     | Conference Abstract | Unspecified   | single cohort                 | Hospital-wide (not-ICU)             | NR              | 7247                   | Adult             | Commercial  | SIRS + Organ dysfunction                               | Patient Outcomes                                    |
| Gerald (2011)_2[82]     | Conference Abstract | United States | single cohort                 | Hospital-wide (not-ICU)             | 1               | 1560                   | Adult             | Unspecified | SIRS + Organ dysfunction                               | Patient Outcomes                                    |
| Gerald (2011)_3[83]     | Conference Abstract | United States | single cohort                 | Hospital-wide (not-ICU)             | 1               | 625                    | Adult             | Unspecified | SIRS + Organ dysfunction                               | Patient Outcomes                                    |
| Ghanem-Zoubi (2011)[84] | Journal Article     | Israel        | single cohort                 | Internal Medicine Department        | 1               | 1072                   | Adult             | Homegrown   | MEDS, MEWS, REMS, SCS, SIRS                            | Patient Outcomes                                    |
| Giesler (2014)[85]      | Conference Abstract | United States | single cohort                 | ED                                  | 2               | 166                    | Adult             | Unspecified | SIRS                                                   | Patient Outcomes, Sepsis Treatment/Management       |
| Gille (2017)[86]        | Journal Article     | Germany       | single cohort                 | Burn ICU                            | 1               | 41                     | Adult             | Commercial  | SIRS                                                   | Patient Outcomes, Sepsis Treatment/Management       |
| Gowda (2011)_1[87]      | Conference Abstract | Unspecified   | single cohort                 | ICU                                 | NR              | 611                    | Age not specified | Unspecified | modified SIRS                                          | Patient Outcomes                                    |
| Gowda (2011)_2[88]      | Conference Abstract | Unspecified   | single cohort                 | ICU                                 | NR              | 439                    | Age not specified | Unspecified | modified SIRS                                          | Patient Outcomes, Sepsis Treatment/Management       |
| Grek (2017)[89]         | Journal Article     | United States | before/after (not controlled) | ED                                  | 1               | NR                     | Age not specified | Homegrown   | SIRS, Unspecified                                      | Patient Outcomes, Sepsis Treatment/Management       |
| Guidi (2015)[90]        | Journal Article     | United States | Survey                        | Inpatient wards (not critical care) | 1               | 232                    | Adult             | Homegrown   | SIRS + Organ dysfunction                               | Usability                                           |
| Guirgis (2017)[91]      | Journal Article     | United States | before/after (not controlled) | Hospital-wide                       | 1               | 3205                   | Adult             | Homegrown   | Adjusted MEWS-SRS                                      | Patient Outcomes, Sepsis Treatment/Management, Cost |
| Harrison (2015)[92]     | Thesis              | United States | before/after (not controlled) | ED, ICU                             | 3               | 158                    | Adult             | Homegrown   | SIRS + Organ dysfunction + sign of suspected infection | Patient Outcomes, Sepsis Treatment/Management       |
| Harrison (2017)[93]     | Journal Article     | United States | controlled study              | ICU                                 | 2               | 12                     | Adult             | Homegrown   | Unspecified                                            | Sepsis Treatment/Management, Usability              |
| Hayden (2016)[94]       | Journal Article     | Unspecified   | before/after (not controlled) | ED                                  | 1               | 238                    | Adult             | Homegrown   | SIRS + sign of infection + SBP                         | Patient Outcomes, Sepsis Treatment/Management       |
| Herasevich (2011)[95]   | Journal Article     | United States | before/after (not controlled) | ICU                                 | 3               | 8609                   | Age not specified | Homegrown   | SIRS + sign of infection + shock                       | Patient Outcomes                                    |

| Author (Year)          | Type of publication | Country        | Principal study type                     | Setting                          | Number of sites | Number of participants | Population        | CCDS type   | CCDS sepsis criteria                                   | Outcome category                                         |
|------------------------|---------------------|----------------|------------------------------------------|----------------------------------|-----------------|------------------------|-------------------|-------------|--------------------------------------------------------|----------------------------------------------------------|
| Hiensch (2017)[96]     | Journal Article     | United States  | interrupted time series (not controlled) | Specific ward                    | 4               | NR                     | Adult             | Homegrown   | Other                                                  | Patient Outcomes, Sepsis Treatment/Management            |
| Honeyford (2020)[97]   | Journal Article     | United Kingdom | before/after (not controlled)            | Hospital-wide                    | 3               | 21732                  | Adult             | Commercial  | SIRS, SIRS + Organ dysfunction                         | Patient Outcomes, Sepsis Treatment/Management            |
| Hooper (2010)[98]      | Conference Abstract | Unspecified    | RCT                                      | ICU                              | NR              | 77                     | Age not specified | Unspecified | modified SIRS                                          | Patient Outcomes, Sepsis Treatment/Management            |
| Hooper (2011)[99]      | Conference Abstract | Unspecified    | RCT                                      | ICU                              | NR              | 10727                  | Age not specified | Unspecified | modified SIRS                                          | Sepsis Treatment/Management                              |
| Hooper (2012)[100]     | Journal Article     | United States  | RCT                                      | Medical ICU                      | 1               | 442                    | Age not specified | Unspecified | modified SIRS                                          | Patient Outcomes, Sepsis Treatment/Management            |
| Horton (2020)[101]     | Journal Article     | United States  | interrupted time series (not controlled) | Acute care wards (not ICU or ED) | 8               | NR                     | Adult             | Homegrown   | MEWS                                                   | Patient Outcomes, Sepsis Treatment/Management, Cost      |
| Huff (2019)[102]       | Journal Article     | Unspecified    | Not enough information to determine      | Specific ward                    | 3               | NR                     | Age not specified | Homegrown   | NEWS, SIRS                                             | Patient Outcomes, Sepsis Treatment/Management, Usability |
| Hughes (2019)[103]     | Journal Article     | United States  | controlled before/after                  | Hospital-wide                    | 3               | 4475                   | Adult             | Unspecified | SIRS + Organ dysfunction                               | Patient Outcomes, Sepsis Treatment/Management, Cost      |
| Jones (2015)[104]      | Journal Article     | United States  | before/after (not controlled)            | ICU, Inpatient wards (not ICU)   | 1               | NR                     | Adult             | Homegrown   | Other                                                  | Patient Outcomes, Sepsis Treatment/Management, Cost      |
| Judd (2014)[105]       | Journal Article     | United States  | before/after (not controlled)            | Hospital-wide                    | 1               | 397                    | Adult             | Unspecified | SIRS + Organ dysfunction                               | Patient Outcomes, Cost                                   |
| Jukes (2013)[106]      | Thesis              | United States  | interrupted time series (not controlled) | Hospital-wide                    | 2               | 51315                  | Adult             | Homegrown   | SIRS + Organ dysfunction + sign of suspected infection | Patient Outcomes, Sepsis Treatment/Management            |
| Jung (2018)[107]       | Journal Article     | United States  | before/after (not controlled)            | Surgical ICU                     | 1               | 30                     | Age not specified | Homegrown   | Other                                                  | Patient Outcomes, Sepsis Treatment/Management            |
| Kangas (2019)[108]     | Journal Article     | United States  | single cohort                            | Inpatient wards (not ICU)        | 1               | 2039                   | Adult             | Homegrown   | MEWS + NEWS + SIRS + shock combination, SIRS + shock   | Patient Outcomes                                         |
| Krieger (2013)[109]    | Conference Abstract | United States  | single cohort                            | ED                               | 1               | 65043                  | Adult             | Homegrown   | Other                                                  | Patient Outcomes                                         |
| Kurczewski (2015)[110] | Journal Article     | United States  | before/after (not controlled)            | Hospital-wide                    | NR              | 60                     | Adult             | Unspecified | modified SIRS                                          | Patient Outcomes, Sepsis Treatment/Management            |
| Lawson (2017)[111]     | Thesis              | United States  | before/after (not controlled)            | Inpatient wards (not ICU)        | 4               | NR                     | Adult             | Unspecified | Unspecified                                            | Patient Outcomes, Sepsis Treatment/Management            |
| Liang (2018)[112]      | Conference Abstract | United States  | controlled study                         | ED, Inpatient wards (not ICU)    | NR              | NR                     | Age not specified | Unspecified | MEWS, SIRS                                             | Sepsis Treatment/Management                              |
| MacMillan (2019)[113]  | Journal Article     | Unspecified    | before/after (not controlled)            | ICU                              | 1               | 160                    | Adult             | Homegrown   | SIRS                                                   | Patient Outcomes, Sepsis Treatment/Management, Cost      |

| Author (Year)            | Type of publication | Country       | Principal study type                | Setting                  | Number of sites | Number of participants | Population        | CCDS type   | CCDS sepsis criteria                                                | Outcome category                              |
|--------------------------|---------------------|---------------|-------------------------------------|--------------------------|-----------------|------------------------|-------------------|-------------|---------------------------------------------------------------------|-----------------------------------------------|
| Mann-Salinas (2014)[114] | Conference Abstract | Unspecified   | single cohort                       | ICU                      | NR              | 47                     | Age not specified | Unspecified | Burn6                                                               | Patient Outcomes                              |
| Manteuffel (2013)[115]   | Conference Abstract | United States | before/after (not controlled)       | ED                       | 1               | 94556                  | Adult             | Unspecified | SIRS + sBP                                                          | Patient Outcomes                              |
| Martin-Rico (2014)[116]  | Conference Abstract | Unspecified   | single cohort                       | ED                       | 1               | 37323                  | Adult             | Homegrown   | SIRS + Organ dysfunction                                            | Patient Outcomes, Sepsis Treatment/Management |
| McCabe (2015)[117]       | Conference Abstract | Unspecified   | Not enough information to determine | Hospital-wide            | NR              | NR                     | Age not specified | Homegrown   | M2SEWS                                                              | Patient Outcomes                              |
| McGrane (2010)[118]      | Conference Abstract | Unspecified   | single cohort                       | ICU                      | NR              | 327                    | Age not specified | Unspecified | modified SIRS                                                       | Patient Outcomes                              |
| McRee (2014)[119]        | Journal Article     | Unspecified   | before/after (not controlled)       | Specific ward            | 1               | 171                    | Adult             | Unspecified | SIRS                                                                | Patient Outcomes                              |
| Meurer (2009)[120]       | Journal Article     | Unspecified   | single cohort                       | ED                       | 1               | 583                    | Adult             | Homegrown   | SIRS                                                                | Patient Outcomes, Sepsis Treatment/Management |
| Miller (2017)[121]       | Journal Article     | United States | Survey                              | Specific ward            | 5               | 151                    | Adult             | Commercial  | Abnormal vital signs & laboratory results                           | Usability                                     |
| Muratore (2019)[122]     | Journal Article     | United States | controlled study                    | Hospital-wide (not-ICU)  | 1               | 10335                  | Adult             | Homegrown   | modified SIRS                                                       | Patient Outcomes, Sepsis Treatment/Management |
| Narayanan (2016)[123]    | Journal Article     | Unspecified   | before/after (not controlled)       | ED                       | 1               | 214                    | Adult             | Homegrown   | SIRS, SIRS + (Organ dysfunction OR fluid nonresponsive hypotension) | Patient Outcomes, Sepsis Treatment/Management |
| Nelson (2011)[124]       | Journal Article     | Unspecified   | before/after (not controlled)       | ED                       | 1               | 33460                  | Adult             | Unspecified | SIRS + SBP                                                          | Patient Outcomes, Sepsis Treatment/Management |
| Nelson (2012)[125]       | Conference Abstract | United States | single cohort                       | ED                       | 4               | 24382                  | Age not specified | Unspecified | modified SIRS, SIRS + Organ dysfunction                             | Patient Outcomes, Sepsis Treatment/Management |
| Nguyen (2014)[126]       | Journal Article     | United States | single cohort                       | ED                       | 1               | 1095                   | Age not specified | Homegrown   | SIRS + Organ dysfunction                                            | Patient Outcomes                              |
| Noonan (2018)[127]       | Thesis              | United States | single cohort                       | ED                       | 1               | 6940                   | Age not specified | Unspecified | SIRS                                                                | Usability                                     |
| Okafor (2014)[128]       | Conference Abstract | Unspecified   | single cohort                       | ED                       | 2               | 3921                   | Age not specified | Unspecified | SIRS                                                                | Patient Outcomes                              |
| Oxman (2013)[129]        | Conference Abstract | United States | before/after (not controlled)       | Hospital-wide            | NR              | NR                     | Age not specified | Homegrown   | Unspecified                                                         | Patient Outcomes, Sepsis Treatment/Management |
| Pandit (2015)[130]       | Conference Abstract | Unspecified   | Case control                        | Cancer center            | 1               | 806                    | Age not specified | Unspecified | Abnormal vital signs, SIRS                                          | Patient Outcomes                              |
| Perlin (2020)[131]       | Journal Article     | United States | before/after (not controlled)       | Inpatient wards (not ED) | 173             | NR                     | Age not specified | Homegrown   | SIRS + sign of suspected infection                                  | Patient Outcomes, Sepsis Treatment/Management |
| Pertiwi (2018)[132]      | Journal Article     | Unspecified   | Heuristic evaluation                | Hospital-wide            | NR              | NR                     | Age not specified | Commercial  | SIRS + Organ dysfunction                                            | Usability                                     |
| Pham (2012)[133]         | Conference Abstract | United States | Not enough information to determine | Specific ward            | 1               | NR                     | Age not specified | Homegrown   | Other + SIRS, SIRS                                                  | Patient Outcomes, Usability                   |

| Author (Year)           | Type of publication | Country       | Principal study type          | Setting                         | Number of sites | Number of participants | Population        | CCDS type   | CCDS sepsis criteria                                   | Outcome category                              |
|-------------------------|---------------------|---------------|-------------------------------|---------------------------------|-----------------|------------------------|-------------------|-------------|--------------------------------------------------------|-----------------------------------------------|
| Powers (2014)[134]      | Conference Abstract | Unspecified   | single cohort                 | ICU, Inpatient wards (not ED)   | NR              | 403                    | Age not specified | Homegrown   | Other + SIRS                                           | Patient Outcomes                              |
| Pulia (2016)[135]       | Conference Abstract | Unspecified   | before/after (not controlled) | ED                              | 1               | 660                    | Adult             | Unspecified | Abnormal vital signs                                   | Sepsis Treatment/Management                   |
| Rauch (2013)[136]       | Conference Abstract | Unspecified   | single cohort                 | Surgical ICU                    | 1               | 1119                   | Age not specified | Unspecified | modified SIRS                                          | Patient Outcomes                              |
| Rincon (2017)[137]      | Journal Article     | United States | Focus groups                  | ICU                             | NR              | NR                     | Age not specified | Homegrown   | Other                                                  | Usability                                     |
| Salamah (2013)[138]     | Conference Abstract | Unspecified   | single cohort                 | ED                              | 1               | 8538                   | Age not specified | Homegrown   | Other + SIRS                                           | Patient Outcomes, Sepsis Treatment/Management |
| Sankey (2017)[139]      | Conference Abstract | United States | before/after (not controlled) | Specific ward                   | 1               | 15554                  | Adult             | Unspecified | modified SIRS                                          | Patient Outcomes                              |
| Santistevan (2017)[140] | Conference Abstract | United States | single cohort                 | ED                              | 1               | 387                    | Adult             | Homegrown   | SIRS + Organ dysfunction + sign of suspected infection | Patient Outcomes                              |
| Sarumi (2013)[141]      | Conference Abstract | United States | before/after (not controlled) | Inpatient wards (not ED or ICU) | 1               | NR                     | Age not specified | Unspecified | SIRS                                                   | Patient Outcomes                              |
| Sawyer (2011)[142]      | Journal Article     | United States | controlled study              | Inpatient wards (not ICU)       | 6               | 300                    | Adult             | Homegrown   | Abnormal vital signs & laboratory results              | Patient Outcomes, Sepsis Treatment/Management |
| Seetharaman (2019)[143] | Journal Article     | United States | single cohort                 | Hospital-wide                   | 5               | 10953                  | Adult             | Unspecified | modified SIRS + organ dysfunction                      | Patient Outcomes, Sepsis Treatment/Management |
| Sharp (2016)_1[144]     | Conference Abstract | Unspecified   | before/after (not controlled) | ED                              | 1               | 656                    | Adult             | Unspecified | Nursing assesment + abnormal vital signs               | Sepsis Treatment/Management                   |
| Sharp (2016)_2[145]     | Conference Abstract | United States | single cohort                 | ED                              | 1               | 1108                   | Adult             | Unspecified | Other                                                  | Patient Outcomes                              |
| Sherwin (2014)[146]     | Conference Abstract | Unspecified   | single cohort                 | ED                              | 2               | 16201                  | Age not specified | Unspecified | SIRS + Organ dysfunction                               | Patient Outcomes                              |
| Shetty (2021)[147]      | Journal Article     | Australia     | single cohort                 | ED                              | 5               | 118178                 | Adult             | Homegrown   | SIRS                                                   | Patient Outcomes                              |
| Song (2019)[148]        | Journal Article     | South Korea   | before/after (not controlled) | ED                              | 1               | 631                    | Adult             | Homegrown   | qSOFA + sign of suspected infection + SOFA             | Patient Outcomes, Sepsis Treatment/Management |
| Swenson (2018)[149]     | Conference Abstract | Unspecified   | survey                        | Inpatient wards                 | 1               | 121                    | Adult             | Unspecified | Abnormal vital signs & laboratory results              | Usability                                     |
| Swenson (2019)[150]     | Conference Abstract | United States | controlled study              | Inpatient wards                 | 1               | 2048                   | Age not specified | Unspecified | SIRS + Organ dysfunction + sign of suspected infection | Patient Outcomes, Sepsis Treatment/Management |
| Tafelski (2010)[151]    | Journal Article     | Germany       | before/after (not controlled) | ICU                             | 3               | 1158                   | Adult             | Homegrown   | Unspecified                                            | Patient Outcomes, Sepsis Treatment/Management |

| Author (Year)            | Type of publication        | Country       | Principal study type                | Setting                             | Number of sites | Number of participants | Population        | CCDS type   | CCDS sepsis criteria                      | Outcome category                                         |
|--------------------------|----------------------------|---------------|-------------------------------------|-------------------------------------|-----------------|------------------------|-------------------|-------------|-------------------------------------------|----------------------------------------------------------|
| Thompson (2003)[152]     | Journal Article            | United States | controlled study                    | ICU                                 | 2               | 203                    | Age not specified | Homegrown   | Other + SIRS, SIRS                        | Patient Outcomes, Sepsis Treatment/Management            |
| Tsai (2015)[153]         | Conference Abstract        | Unspecified   | single cohort                       | ED                                  | 1               | 13906                  | Age not specified | Homegrown   | Unspecified                               | Patient Outcomes                                         |
| Umscheid (2015)[154]     | Journal Article            | United States | before/after (not controlled)       | Inpatient wards (not critical care) | 3               | 31093                  | Adult             | Homegrown   | SIRS + Organ dysfunction                  | Patient Outcomes, Sepsis Treatment/Management            |
| Watanabe (2017)[155]     | Conference Abstract        | United States | single cohort                       | Hospital-wide                       | 1               | 100                    | Adult             | Commercial  | SIRS, SIRS + Organ dysfunction            | Sepsis Treatment/Management                              |
| Wawrose (2016)[156]      | Journal Article            | United States | single cohort                       | Specific ward                       | 1               | 348                    | Adult             | Commercial  | SIRS, SIRS + Organ dysfunction            | Patient Outcomes                                         |
| Westphal (2018)[157]     | Journal Article            | Brazil        | before/after (not controlled)       | Hospital-wide (not-ICU)             | 1               | 637                    | Age not specified | Homegrown   | MEWS                                      | Patient Outcomes, Sepsis Treatment/Management            |
| Winterbottom (2016)[158] | Research Showcase abstract | Unspecified   | Not enough information to determine | Inpatient wards                     | NR              | NR                     | Age not specified | Unspecified | MEWS                                      | Patient Outcomes, Sepsis Treatment/Management            |
| Wolpaw (2018)[159]       | Conference Abstract        | United States | before/after (not controlled)       | Acute care wards                    | NR              | NR                     | Age not specified | Unspecified | Abnormal vital signs & laboratory results | Patient Outcomes, Sepsis Treatment/Management, Usability |
| Yeich (2012)[160]        | Conference Abstract        | United States | before/after (not controlled)       | ED, Inpatient wards                 | 1               | NR                     | Age not specified | Unspecified | SIRS + Organ dysfunction, SIRS + shock    | Patient Outcomes                                         |
| Yohannes (2019)[161]     | Conference Abstract        | United States | before/after (not controlled)       | Hospital-wide                       | 1               | 4102                   | Age not specified | Unspecified | SIRS                                      | Patient Outcomes, Sepsis Treatment/Management            |
| Zaragoza (2019)[162]     | Conference Abstract        | Unspecified   | single cohort                       | Hospital-wide                       | 1               | NR                     | Age not specified | Homegrown   | Sepsis-2, Sepsis-3                        | Patient Outcomes                                         |
| Zuick (2016)[163]        | Journal Article            | United States | single cohort                       | Inpatient wards (not ED or ICU)     | 1               | 97                     | Age not specified | Homegrown   | Other                                     | Patient Outcomes, Sepsis Treatment/Management            |

ICU=Intensive care unit, NR=not reported, SOFA=Sequential Organ Failure Assessment, ED=Emergency Department, MEWS=Modified Early Warning Score, SIRS= Systemic Inflammatory Response Syndrome, MAP=Mean Arterial Pressure, MEWS-SRS=Modified early warning signs-sepsis recognition score, RCT=Randomised Control Trial, SBP=Systolic blood pressure, NEWS=National Early Warning Score, MEDS=Mortality in emergency department sepsis score, REMS=Rapid emergency medicine score, SCS=Simple clinical score, qSOFA=Quick Sepsis-related Organ Failure Assessment.
