# Supplementary material for: Computerized Clinical Decision Support Systems for the Early Detection of Sepsis Among Adult Inpatients: Scoping Review
Source: PubMed Central journal article supplement (PMC8908200; doi:10.2196/31083), 2022-02-23

### Multimedia appendix 6: Number of journal articles by country (n=65)

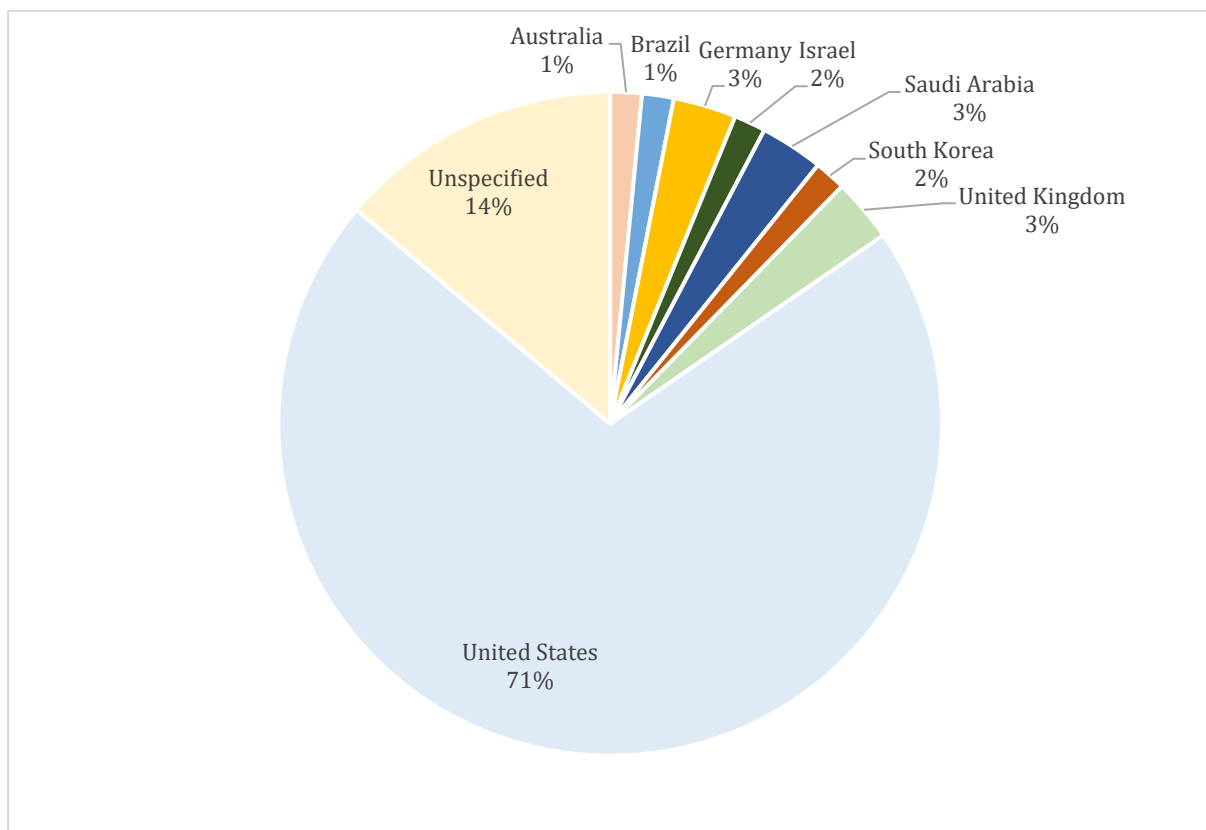

Supplement: jmir_v24i2e31083_app6.pdf [file jmir_v24i2e31083_app6.pdf]
