# Supplementary material for: Computerized Clinical Decision Support Systems for the Early Detection of Sepsis Among Adult Inpatients: Scoping Review
Source: PubMed Central journal article supplement (PMC8908200; doi:10.2196/31083), 2022-02-23
Supplement: jmir_v24i2e31083_app7.pdf [file jmir_v24i2e31083_app7.pdf]

## Multimedia appendix 7: Main outcomes and outcome categories in gray literature

### A) Conference abstracts (n=54)

| Outcome category                       | Outcome classification <sup>a</sup> , n(% <sup>b</sup> ) |           |                            | Total, n (% <sup>d</sup> ) |
|----------------------------------------|----------------------------------------------------------|-----------|----------------------------|----------------------------|
|                                        | Primary                                                  | Secondary | Not specified <sup>c</sup> |                            |
| <b>Patient outcomes</b>                |                                                          |           |                            |                            |
| Mortality                              | 3 (13)                                                   | 1 (4)     | 19 (83)                    | 23 (43)                    |
| Sepsis identification                  | 11 (42)                                                  | 1 (4)     | 14 (54)                    | 26 (48)                    |
| Length of stay                         | 0 (0)                                                    | 0 (0)     | 5 (100)                    | 5 (9)                      |
| Intensive care unit admission          | 0 (0)                                                    | 0 (0)     | 5 (100)                    | 5 (9)                      |
| Other                                  | 1 (14)                                                   | 0 (0)     | 6 (86)                     | 7 (13)                     |
| <b>Sepsis Treatment and Management</b> |                                                          |           |                            |                            |
| Antibiotics                            | 3 (27)                                                   | 0 (0)     | 8 (73)                     | 11 (20)                    |
| Lactate                                | 0 (0)                                                    | 0 (0)     | 1 (100)                    | 1 (2)                      |
| Fluids                                 | 0 (0)                                                    | 0 (0)     | 5 (100)                    | 5 (9)                      |
| Blood culture                          | 0 (0)                                                    | 1 (33)    | 2 (67)                     | 3 (6)                      |
| Sepsis bundle or protocol compliance   | 1 (13)                                                   | 0 (0)     | 7 (88)                     | 8 (15)                     |
| Other                                  | 1 (8)                                                    | 1 (8)     | 10 (83)                    | 12 (22)                    |
| <b>Usability</b>                       |                                                          |           |                            |                            |
| Efficiency                             | 0 (0)                                                    | 1 (50)    | 1 (50)                     | 2 (4)                      |
| Effectiveness                          | 0 (0)                                                    | 1 (50)    | 1 (50)                     | 2 (4)                      |
| Satisfaction                           | 0 (0)                                                    | 1 (25)    | 3 (75)                     | 4 (7)                      |
| <b>Cost</b>                            |                                                          |           |                            |                            |
| Cost                                   | 0 (0)                                                    | 0 (0)     | 1 (100)                    | 1 (2)                      |

### B) Theses (n=5)

| Outcome category                       | Outcome classification <sup>a</sup> , n(% <sup>b</sup> ) |           |                            | Total, n (% <sup>d</sup> ) |
|----------------------------------------|----------------------------------------------------------|-----------|----------------------------|----------------------------|
|                                        | Primary                                                  | Secondary | Not specified <sup>c</sup> |                            |
| <b>Patient outcomes</b>                |                                                          |           |                            |                            |
| Mortality                              | 0 (0)                                                    | 1 (50)    | 1 (50)                     | 2 (40)                     |
| Sepsis identification                  | 0 (0)                                                    | 0 (0)     | 3 (100)                    | 3 (60)                     |
| Length of stay                         | 0 (0)                                                    | 1 (50)    | 1 (50)                     | 2 (40)                     |
| Other                                  | 0 (0)                                                    | 1 (50)    | 1 (50)                     | 2 (40)                     |
| <b>Sepsis Treatment and Management</b> |                                                          |           |                            |                            |
| Antibiotics                            | 0 (0)                                                    | 0 (0)     | 2 (100)                    | 2 (40)                     |
| Lactate                                | 0 (0)                                                    | 0 (0)     | 1 (100)                    | 1 (20)                     |
| Fluids                                 | 0 (0)                                                    | 0 (0)     | 1 (100)                    | 1 (20)                     |
| Blood culture                          | 0 (0)                                                    | 0 (0)     | 2 (100)                    | 2 (40)                     |
| Sepsis bundle or protocol compliance   | 0 (0)                                                    | 0 (0)     | 1 (100)                    | 1 (20)                     |
| Other                                  | 1 (33)                                                   | 0 (0)     | 2 (67)                     | 3 (60)                     |
| <b>Usability</b>                       |                                                          |           |                            |                            |
| Effectiveness                          | 1 (100)                                                  | 0 (0)     | 0 (0)                      | 1 (20)                     |

<sup>a</sup>Some studies reported both primary, secondary, or non-specified outcomes within the same outcome group. To avoid double-counting these studies, secondary outcomes were not counted in favor of counting primary outcomes. Similarly, non-specified outcomes were not counted in favor of primary or

secondary outcomes. For example, a study may have the primary outcome mortality (30-day) and the secondary outcome mortality (7-day), which would both fall into the mortality outcome group. In this example the study would be counted as having mortality as the primary outcome.

<sup>b</sup>These percentages were calculated as row percentages, i.e. using the total number in each row as the denominator.

<sup>c</sup>The study did not specify whether the outcomes were primary or secondary.

<sup>d</sup>The percentages were calculated from the number of conference abstracts (n=54) or theses (n=5), not the number of total outcomes. As many studies reported multiple outcomes the percentages will add up to more than 100%.
