# Supplementary material for: Computerized Clinical Decision Support Systems for the Early Detection of Sepsis Among Adult Inpatients: Scoping Review
Source: PubMed Central journal article supplement (PMC8908200; doi:10.2196/31083), 2022-02-23
Supplement: jmir_v24i2e31083_app8.pdf [file jmir_v24i2e31083_app8.pdf]

Multimedia appendix 8: Types of mortality reported in journal articles (n=65)

| Mortality type                                                                  | Times reported, n(%) |
|---------------------------------------------------------------------------------|----------------------|
| <b>Total</b>                                                                    | <b>55</b>            |
| Adjusted mortality                                                              | 1 (2)                |
| Hospital mortality rate                                                         | 1 (2)                |
| Mortality                                                                       | 6 (11)               |
| Mortality (10-day) prediction                                                   | 1 (2)                |
| Mortality (1-day) prediction                                                    | 1 (2)                |
| Mortality (28-day in-hospital) prediction                                       | 1 (2)                |
| Mortality (28-day)                                                              | 1 (2)                |
| Mortality (30-day all-cause)                                                    | 2 (4)                |
| Mortality (30-day in-hospital all-cause)                                        | 1 (2)                |
| Mortality (30-day) prediction                                                   | 1 (2)                |
| Mortality (5-day) prediction                                                    | 1 (2)                |
| Mortality (60-day) prediction                                                   | 1 (2)                |
| Mortality (90-day)                                                              | 1 (2)                |
| Mortality (admitted in-patients with sepsis)                                    | 1 (2)                |
| Mortality (all-cause 14 day)                                                    | 1 (2)                |
| Mortality (all-cause 7 day)                                                     | 1 (2)                |
| Mortality (emergency department admitted patients with sepsis)                  | 1 (2)                |
| Mortality (Health care facility-onset Clostridium difficile infections)         | 1 (2)                |
| Mortality (hospital)                                                            | 1 (2)                |
| Mortality (intensive care unit admitted)                                        | 1 (2)                |
| Mortality (intensive care unit)                                                 | 1 (2)                |
| Mortality (in-hospital 30-day)                                                  | 1 (2)                |
| Mortality (in-hospital post nurse practitioner rapid response team interaction) | 1 (2)                |
| Mortality (in-hospital)                                                         | 13 (24)              |
| Mortality (in-hospital) prediction                                              | 1 (2)                |
| Mortality (inpatient)                                                           | 1 (2)                |
| Mortality (respiratory failure related)                                         | 1 (2)                |
| Mortality (sepsis-related in-hospital)                                          | 1 (2)                |
| Mortality (sepsis-related in-patient)                                           | 1 (2)                |
| Mortality (sepsis-related)                                                      | 3 (5)                |
| Mortality (within 30 days of alert)                                             | 1 (2)                |
| Mortality rate                                                                  | 1 (2)                |
| Mortality within 48hr of alert                                                  | 1 (2)                |
| Risk-adjusted mortality index                                                   | 1 (2)                |
| Unadjusted mortality                                                            | 1 (2)                |
